# Supplementary material for: Markers of NETosis in Patients with Systemic Lupus Erythematosus and Antiphospholipid Syndrome
Source: MDPI journal article supplement (doi:10.3390/ijms24119210), 2023-05-24
Supplement: s1 [file s1]

**Table S1.** Characteristics of included patients

| Parameters                           | SLE without APS<br>n=47 | SLE with APS<br>n=30 | PAPS<br>n=41 | HC<br>n=20 | <i>p</i>          |
|--------------------------------------|-------------------------|----------------------|--------------|------------|-------------------|
| Age, years, M±σ                      | 34±9.84                 | 39±8.27              | 44±10.55     | 31.5±9.71  | <i>p</i> < 0.0001 |
| Gender: female/male n, %             | 26 /4                   | 34 /13               | 29 /12       | 14 /6      | <i>p</i> = 0.394  |
| Disease duration, years, Me [25; 75] | 4,8 [0.7;11,1]          | 14 [10;22,5]         | 8,5 [2;15]   | -          | <i>p</i> < 0.0001 |

**Note:** SLE, Systemic lupus erythematosus; APS, Antiphospholipid syndrome; PAPS, primary antiphospholipid syndrome; HC, healthy controls. Me, median with an interquartile range; M±σ, where M is mean, σ is standard deviation; *p*, probability.

**Table S2.** Clinical and laboratory manifestations of SLE for the entire period of the disease according to the 1997 ACR criteria and ongoing therapy

| Parameters                    | SLE without APS<br>(n=30),<br>n (%) | SLE with APS<br>(n=47),<br>n (%) | Total<br>(n=77),<br>n (%) |
|-------------------------------|-------------------------------------|----------------------------------|---------------------------|
| Malar rash                    | 17 (57)                             | 19 (40)                          | 36 (47)                   |
| Discoid rash                  | 2 (7)                               | -                                | 2 (3)                     |
| Photosensitivity              | 14 (47)                             | 12 (26)                          | 26 (33)                   |
| Oral ulcers                   | 11 (37)                             | 7 (15)                           | 18 (23)                   |
| Arthritis                     | 24 (80)                             | 31 (66)                          | 55 (71)                   |
| Serositis                     | 21 (70)                             | 27 (57)                          | 48 (62)                   |
| Renal disorder                | 19 (63)                             | 18 (38)                          | 37 (48)                   |
| Central nervous system damage | 4 (13)                              | 11 (23)                          | 15 (20)                   |
| Hematological disorders       | 21 (70)                             | 34 (72)                          | 55 (71)                   |
| Immunological disorders       | 30 (100)                            | 47 (100)                         | 77 (100)                  |
| Positive antinuclear factor   | 30 (100)                            | 47 (100)                         | 77 (100)                  |
| SLEDAI-2K, Me [25;75]         | 11,5 [8;19]                         | 4 [2;7]                          | 6 [3;13]                  |
| ID SLICC/ACR, Me [25;75]      | 0 [0;1]                             | 3 [2;4]                          | 2 [0;3]                   |
| Therapy *, n (%)              | 27 (90)                             | 45 (96)                          | 72 (94)                   |
| Glucocorticoids               | 27 (90)                             | 43 (92)                          | 70 (91)                   |
| Hydroxychloroquine            | 22 (73)                             | 37 (72)                          | 59 (77)                   |
| DMARDs                        | 11 (28)                             | 6 (13)                           | 17 (22)                   |
| - MMF                         | -6                                  | -5                               | -11                       |
| - CYC                         | -4                                  | -0                               | -4                        |
| - AZA                         | -1                                  | -1                               | -2                        |
| Biologic DMARDs               | 3 (10)                              | 10 (21)                          | 13(17)                    |
| -RTX                          | -2                                  | -10                              | -12                       |
| -BLM                          | -1                                  | 0                                | -1                        |
| -Targeted synthetic           |                                     |                                  |                           |
| -DMARDs                       | 1                                   | -                                | 1                         |
| -Baricitinib                  | 1                                   |                                  | 1                         |

**Note:** SLE, systemic lupus erythematosus; ACR, American College of Rheumatology, APS, antiphospholipid syndrome; SLEDAI-2K, Systemic Lupus Erythematosus Disease Activity Index; DI SLICC/ACR, The Systemic Lupus International Collaborating Clinics/ American College of Rheumatology Damage Index; DMARDs, disease-modifying antirheumatic drugs; MMF, mycophenolate mofetil; AZA, azathioprine; CYC, cyclophosphamide; RTX, rituximab; BLM, belimumab. \*at the time of inclusion in the study.

**Table S3.** Clinical and laboratory manifestations of APS and ongoing therapy

| Parameters                                                                                      | SLE with APS<br>(n=47),<br>n (%) | PAPS<br>(n=41),<br>n (%) | Total<br>(n=88),<br>n (%) |
|-------------------------------------------------------------------------------------------------|----------------------------------|--------------------------|---------------------------|
| Thrombosis, n, %                                                                                | 41 (87)                          | 34 (83)                  | 75 (85)                   |
| Arterial, n (%) / N                                                                             | 8 (20) / 41                      | 7 (21) / 34              | 15 (17)                   |
| Venous, n (%) / N                                                                               | 17 (42) / 41                     | 14 (41) / 34             | 31 (35)                   |
| Arterial+ Venous, n (%) / N                                                                     | 16 (39) / 41                     | 13 (38) / 34             | 29 (33)                   |
| Pregnancy morbidity *, n (%) / N                                                                | 17 (68) / 25                     | 15 (94) / 16             | 32 (78) / 41              |
| ≥3 unexplained consecutive spontaneous abortions before the 10th week of gestation              | 2 (12) / 17                      | 0                        | 2 (5) / 41                |
| ≥1 unexplained deaths of a morphologically normal fetus at or beyond the 10th week of gestation | 4 (24) / 17                      | 8 (53) / 15              | 12 (29) / 41              |
| ≥1 premature births of a morphologically normal neonate before the 34th week of gestation       | 1 (6) / 17                       | 3 (20) / 15              | 4 (10) / 41               |
| Early+late pregnancy loss                                                                       | 10 (59) / 17                     | 4 (27) / 15              | 14 (34) / 41              |
| aPL**                                                                                           |                                  |                          |                           |
| Negative IgG aCL, n (%)                                                                         | 21 (45%)                         | 11 (27%)                 | 32 (36)                   |
| Low titers of IgG aCL, n (%)                                                                    | 2 (4%)                           | 0                        | 2 (2)                     |
| Medium titers of IgG aCL, n (%)                                                                 | 8 (17%)                          | 6 (15%)                  | 14 (16)                   |
| High titers of IgG aCL, n (%)                                                                   | 16 (34%)                         | 24 (59%)                 | 40 (45)                   |
| Negative IgM aCL, n (%)                                                                         | 39 (83)                          | 33 (81)                  | 70 (80)                   |
| Low titers of IgM aCL, n (%)                                                                    | 2 (4)                            | 0                        | 2 (2)                     |
| Medium titers of IgM aCL, n (%)                                                                 | 1 (2)                            | 0                        | 1 (1)                     |
| High titers of IgM aCL, n (%)                                                                   | 5 (11)                           | 8 (20)                   | 13 (15)                   |
| Negative IgG aβ2GP1, n (%)                                                                      | 22 (47)                          | 9 (22)                   | 31 (35)                   |

|                                                   |            |            |         |
|---------------------------------------------------|------------|------------|---------|
| Low titers of IgG aβ2GP1, n (%)                   | 3 (6)      | 5 (12)     | 8 (9)   |
| Medium titers of IgG aβ2GP1, n (%)                | 7 (15)     | 3 (7)      | 10 (11) |
| High titers of IgG aβ2GP1, n (%)                  | 15 (32)    | 24 (59)    | 39 (44) |
| Negative IgM aβ2GP1, n (%)                        | 40 (85)    | 21 (78)    | 61 (69) |
| Low titers of IgM aβ2GP1, n (%)                   | 1 (2)      | 1 (2)      | 2 (2)   |
| Medium titers IgM aβ2GP1, n (%) of                | 4 (9)      | 3 (7)      | 7 (8)   |
| High titers of IgM aβ2GP1, n (%)                  | 2 (4)      | 5 (12)     | 7 (8)   |
| Lupus anticoagulant in the medical history, n (%) | 31 (70)/44 | 25 (69)/36 | 56 (64) |
| Therapy ***                                       | 45 (96)    | 40 (98)    | 85 (97) |
| Anticoagulants                                    | 36 (77)    | 37 (90)    | 73 (83) |
| Antiplatelet drugs                                | 16 (34)    | 19 (46)    | 35 (40) |

**Note:** SLE, systemic lupus erythematosus; APS, antiphospholipid syndrome; PAPS, primary antiphospholipid syndrome; aPL, antiphospholipid antibodies; aCL, anti- cardiolipin antibodies; IgG, immunoglobulin G; IgM, immunoglobulin M; aβ2GP1, antibodies to β2 glycoprotein 1; dsDNA antibodies, antibodies to double-stranded DNA; Me, median with an interquartile range; \*Pregnancy and pregnancy morbidity during illness were considered. \*\*aPL levels at the time of blood sampling; \*\*\*Therapies administered at the time of blood sampling.
